# Supplementary material for: Computational evaluation of aluminophosphate zeotypes for CO2/N2separation
Source: Royal Society of Chemistry journal article supplement (doi:10.1039/c7cp03841k), 2017-01-01
Supplement: c7cp03841k2.zip [file c7cp03841k2.zip]

## Sheet: Summary
	CO2 working capacity			CO2/N2 selectivity
	(in mmol/g)
	VSA	PSA 1	PSA 2	VSA	PSA 1	PSA 2
	p_ads = 100 kPa	p_ads = 500 kPa	p_ads = 1000 kPa	S(CO2/N2)	S(CO2/N2)	S(CO2/N2)
	p_des = 10 kPa	p_des = 100 kPa	p_des = 100 kPa	at p = 100 kPa	at p = 500 kPa	at p = 1000 kPa
AEI	0.302212	1.11054	1.9775	15.7268	21.0306	26.2622
AEN	0.292677	0.754446	1.16339	79.5375	83.7603	85.2824
AFT	0.40728	1.11419	1.9372	19.9779	21.7316	24.9413
AFV	0.388321	1.02117	1.66478	15.6839	19.6314	22.6709
AFX	0.461578	1.06543	1.87824	23.1874	22.4101	25.5578
AFY	0.384885	1.51293	2.80509	20.3434	22.5073	24.972
APC	0.29911	0.805547	1.29302	86.1243	80.3841	75.7257
ATN	1.00696	0.546016	0.729361	79.5951	82.1924	90.6574
ATT	1.09113	1.02376	1.3462	76.4016	82.0928	86.7871
AVL	0.464123	1.06491	1.7736	19.6554	21.9763	25.6806
BPH	0.209275	0.863565	1.76319	13.4906	15.6014	18.3738
CHA	0.338641	1.16892	2.0084	15.2472	20.1191	23.977
GIS	1.73883	1.57717	1.81308	131.988	161.003	164.748
GME	0.538391	0.979646	1.69462	32.029	25.7102	26.2364
KFI	0.461779	1.38577	2.38421	25.7001	31.3913	35.8613
LEV	0.396009	0.990342	1.66186	15.6752	19.4699	23.3394
MER	0.353967	0.962213	1.58663	31.1469	38.6128	41.5617
PHI	0.627881	1.16632	1.7678	42.666	44.4076	44.0259
RHO	0.313903	1.07507	1.98648	14.0882	15.0908	16.7645
SAV	0.364513	1.20726	2.20358	17.9903	22.2371	27.6915
SIV	1.09887	1.44099	1.87411	75.3727	76.3116	72.0311

## Sheet: AEI
Pressure				Amounts adsorbed			Selectivity		Heats of adsorption
p(CO2)	p(N2)	p_total		n(CO2)	n(N2)		S(CO2/N2)		qst(CO2)	qst(N2)
kPa	kPa	kPa		mmol/g	mmol/g				kJ/mol	kJ/mol
1.5	8.5	10		0.0345664	0.0136602		14.3392		22.7627	13.1117
3	17	20		0.068646	0.0268042		14.5124		22.812	13.1362
4.5	25.5	30		0.103206	0.0400715		14.5947		22.9444	13.1733
6	34	40		0.136996	0.0523655		14.8248		22.9825	13.2078
7.5	42.5	50		0.170298	0.0644121		14.982		23.1028	13.2296
9	51	60		0.203708	0.0764782		15.0937		23.1722	13.2575
10.5	59.5	70		0.240444	0.0884365		15.4067		23.2871	13.2935
12	68	80		0.273453	0.0990428		15.6455		23.3828	13.3273
13.5	76.5	90		0.305968	0.110811		15.6466		23.4234	13.356
15	85	100		0.336779	0.121348		15.7268		23.5054	13.3854
30	170	200		0.644831	0.215622		16.9465		24.2022	13.6564
45	255	300		0.947628	0.288419		18.6184		24.8953	13.9267
60	340	400		1.20964	0.344839		19.8777		25.459	14.1535
75	425	500		1.44732	0.389978		21.0306		25.958	14.3538
90	510	600		1.6657	0.417563		22.605		26.4189	14.524
105	595	700		1.86382	0.446708		23.6433		26.7954	14.6978
120	680	800		2.03776	0.467408		24.705		27.1622	14.8371
135	765	900		2.20498	0.48167		25.9408		27.4514	14.9839
150	850	1000		2.31428	0.499358		26.2622		27.6558	15.0727

## Sheet: AEN
Pressure				Amounts adsorbed			Selectivity		Heats of adsorption
p(CO2)	p(N2)	p_total		n(CO2)	n(N2)		S(CO2/N2)		qst(CO2)	qst(N2)
kPa	kPa	kPa		mmol/g	mmol/g				kJ/mol	kJ/mol
1.5	8.5	10		0.0372703	0.00266973		79.1085		32.5808	17.1043
3	17	20		0.0739994	0.00523749		80.0631		32.668	17.1381
4.5	25.5	30		0.108539	0.00771997		79.6702		32.6692	17.1393
6	34	40		0.14237	0.0102062		79.0463		32.6856	17.1574
7.5	42.5	50		0.177353	0.0124649		80.6263		32.6941	17.1816
9	51	60		0.208594	0.0148913		79.3774		32.7121	17.1932
10.5	59.5	70		0.240822	0.017183		79.419		32.7825	17.2032
12	68	80		0.270486	0.0193725		79.1201		32.8157	17.2247
13.5	76.5	90		0.299533	0.0215737		78.6767		32.8397	17.237
15	85	100		0.329948	0.0235072		79.5375		32.8408	17.2478
30	170	200		0.585171	0.0413469		80.1987		33.0988	17.365
45	255	300		0.78466	0.0545227		81.5514		33.3469	17.4477
60	340	400		0.951509	0.0656084		82.1828		33.4693	17.5286
75	425	500		1.08439	0.0733629		83.7603		33.6647	17.5774
90	510	600		1.1938	0.0805793		83.9531		33.773	17.625
105	595	700		1.28377	0.0861143		84.4771		33.9045	17.6586
120	680	800		1.36607	0.0918607		84.2695		34.0654	17.6754
135	765	900		1.4215	0.0957038		84.1677		34.0619	17.7079
150	850	1000		1.49333	0.0992259		85.2824		34.2093	17.7351

## Sheet: AFT
Pressure				Amounts adsorbed			Selectivity		Heats of adsorption
p(CO2)	p(N2)	p_total		n(CO2)	n(N2)		S(CO2/N2)		qst(CO2)	qst(N2)
kPa	kPa	kPa		mmol/g	mmol/g				kJ/mol	kJ/mol
1.5	8.5	10		0.0588044	0.0152244		21.8876		27.0789	13.6533
3	17	20		0.113281	0.0300731		21.3455		26.9738	13.6501
4.5	25.5	30		0.164427	0.044278		21.0433		26.8666	13.6552
6	34	40		0.21369	0.0582218		20.7982		26.7763	13.6359
7.5	42.5	50		0.259699	0.0717809		20.5016		26.7223	13.6433
9	51	60		0.304587	0.0840046		20.5464		26.6505	13.6065
10.5	59.5	70		0.353581	0.0961273		20.8435		26.6562	13.5913
12	68	80		0.393241	0.1083		20.5759		26.5558	13.6107
13.5	76.5	90		0.431221	0.120084		20.349		26.4924	13.6178
15	85	100		0.466085	0.132203		19.9779		26.4602	13.6259
30	170	200		0.812204	0.231502		19.881		26.2436	13.6957
45	255	300		1.11123	0.303848		20.724		26.3153	13.7745
60	340	400		1.35999	0.365432		21.089		26.4611	13.8983
75	425	500		1.58028	0.412069		21.7316		26.5844	14.0205
90	510	600		1.77115	0.452595		22.1755		26.7937	14.1369
105	595	700		1.93162	0.484632		22.5859		26.934	14.2391
120	680	800		2.11394	0.509999		23.4883		27.1201	14.3643
135	765	900		2.27588	0.52786		24.4319		27.3608	14.4487
150	850	1000		2.40329	0.546026		24.9413		27.5244	14.5231

## Sheet: AFV
Pressure				Amounts adsorbed			Selectivity		Heats of adsorption
p(CO2)	p(N2)	p_total		n(CO2)	n(N2)		S(CO2/N2)		qst(CO2)	qst(N2)
kPa	kPa	kPa		mmol/g	mmol/g				kJ/mol	kJ/mol
1.5	8.5	10		0.0492408	0.0191709		14.555		23.4638	14.1938
3	17	20		0.0964817	0.0375747		14.5505		23.4862	14.2198
4.5	25.5	30		0.143042	0.0551299		14.7029		23.5696	14.2289
6	34	40		0.190127	0.071673		15.0319		23.6483	14.2437
7.5	42.5	50		0.233746	0.0879097		15.0673		23.6812	14.2641
9	51	60		0.278565	0.102566		15.3904		23.7844	14.2759
10.5	59.5	70		0.31671	0.117742		15.2426		23.8132	14.2899
12	68	80		0.358295	0.131745		15.4112		23.8611	14.2983
13.5	76.5	90		0.396444	0.145369		15.4538		23.9432	14.3224
15	85	100		0.437562	0.158093		15.6839		24.004	14.3453
30	170	200		0.770154	0.260918		16.7264		24.4903	14.4629
45	255	300		1.04136	0.332986		17.7217		24.9354	14.5806
60	340	400		1.26132	0.386173		18.5085		25.314	14.6888
75	425	500		1.45873	0.421069		19.6314		25.6526	14.7805
90	510	600		1.63354	0.451244		20.5139		25.994	14.8711
105	595	700		1.77255	0.474415		21.1722		26.2253	14.9349
120	680	800		1.88596	0.492299		21.7086		26.3753	14.9921
135	765	900		2.00611	0.507867		22.3837		26.6157	15.058
150	850	1000		2.10235	0.525489		22.6709		26.812	15.115

## Sheet: AFX
Pressure				Amounts adsorbed			Selectivity		Heats of adsorption
p(CO2)	p(N2)	p_total		n(CO2)	n(N2)		S(CO2/N2)		qst(CO2)	qst(N2)
kPa	kPa	kPa		mmol/g	mmol/g				kJ/mol	kJ/mol
1.5	8.5	10		0.071883	0.0158959		25.6252		28.42	14.1048
3	17	20		0.137503	0.0310234		25.1159		28.2899	14.047
4.5	25.5	30		0.198646	0.0454215		24.7825		28.1994	14.0031
6	34	40		0.2542	0.058845		24.479		28.1054	13.9684
7.5	42.5	50		0.307102	0.071904		24.2023		28.0155	13.926
9	51	60		0.356731	0.0850398		23.771		27.9468	13.91
10.5	59.5	70		0.402796	0.0972212		23.4775		27.851	13.8909
12	68	80		0.446241	0.108396		23.3284		27.7655	13.853
13.5	76.5	90		0.492396	0.119439		23.3613		27.7501	13.8312
15	85	100		0.533461	0.13037		23.1874		27.6635	13.8138
30	170	200		0.876814	0.225299		22.0534		27.29	13.7628
45	255	300		1.14801	0.298668		21.7814		27.1644	13.797
60	340	400		1.39455	0.357377		22.1123		27.163	13.8601
75	425	500		1.59889	0.404299		22.4101		27.2414	13.9545
90	510	600		1.79682	0.440918		23.0927		27.3467	14.0415
105	595	700		1.96291	0.472175		23.5573		27.4674	14.1361
120	680	800		2.12833	0.496684		24.2822		27.6286	14.2131
135	765	900		2.27072	0.520177		24.7366		27.7657	14.311
150	850	1000		2.4117	0.534723		25.5578		27.9082	14.3825

## Sheet: AFY
Pressure				Amounts adsorbed			Selectivity		Heats of adsorption
p(CO2)	p(N2)	p_total		n(CO2)	n(N2)		S(CO2/N2)		qst(CO2)	qst(N2)
kPa	kPa	kPa		mmol/g	mmol/g				kJ/mol	kJ/mol
1.5	8.5	10		0.0437593	0.0123019		20.157		25.329	12.5036
3	17	20		0.0862246	0.024667		19.8081		25.2786	12.5276
4.5	25.5	30		0.129658	0.0369106		19.9056		25.3325	12.5528
6	34	40		0.171475	0.0485844		20		25.2717	12.5512
7.5	42.5	50		0.213318	0.0606548		19.9292		25.3483	12.5711
9	51	60		0.254241	0.0725601		19.8552		25.3373	12.6065
10.5	59.5	70		0.303373	0.0846087		20.3184		25.458	12.6545
12	68	80		0.34127	0.0959899		20.1465		25.4359	12.6469
13.5	76.5	90		0.389493	0.107428		20.5452		25.4728	12.687
15	85	100		0.428644	0.119399		20.3434		25.4698	12.7177
30	170	200		0.838204	0.228035		20.8293		25.7429	12.9394
45	255	300		1.23566	0.328201		21.3346		26.0338	13.1743
60	340	400		1.60462	0.414374		21.9436		26.3357	13.3819
75	425	500		1.94157	0.48883		22.5073		26.5719	13.5929
90	510	600		2.24783	0.551061		23.1148		26.8103	13.7757
105	595	700		2.53498	0.610064		23.5465		27.0948	13.9595
120	680	800		2.77798	0.657352		23.9474		27.2905	14.1204
135	765	900		3.00779	0.693732		24.5688		27.4885	14.2568
150	850	1000		3.23373	0.733802		24.972		27.7362	14.4322

## Sheet: APC
Pressure				Amounts adsorbed			Selectivity		Heats of adsorption
p(CO2)	p(N2)	p_total		n(CO2)	n(N2)		S(CO2/N2)		qst(CO2)	qst(N2)
kPa	kPa	kPa		mmol/g	mmol/g				kJ/mol	kJ/mol
1.5	8.5	10		0.038018	0.00243814		88.3606		32.2429	17.335
3	17	20		0.0743937	0.00478575		88.0875		32.2412	17.3699
4.5	25.5	30		0.110227	0.00710932		87.859		32.2739	17.3661
6	34	40		0.144588	0.00940224		87.1425		32.2703	17.3866
7.5	42.5	50		0.180453	0.0117648		86.9177		32.3145	17.4116
9	51	60		0.213618	0.0139217		86.9506		32.3193	17.4411
10.5	59.5	70		0.245248	0.0159476		87.1438		32.3391	17.4368
12	68	80		0.278773	0.0181632		86.9731		32.3607	17.4374
13.5	76.5	90		0.307416	0.0200896		86.7126		32.3873	17.4556
15	85	100		0.337128	0.0221818		86.1243		32.3875	17.4683
30	170	200		0.604863	0.0404356		84.7659		32.5422	17.5819
45	255	300		0.816411	0.0559982		82.6157		32.68	17.6657
60	340	400		0.998671	0.0693127		81.6465		32.7848	17.7517
75	425	500		1.14268	0.0805527		80.3841		32.8851	17.824
90	510	600		1.27453	0.091224		79.1716		32.9662	17.8881
105	595	700		1.37033	0.0990995		78.3577		33.0482	17.9252
120	680	800		1.47572	0.108737		76.9046		33.1245	17.9701
135	765	900		1.57269	0.116102		76.7593		33.1871	18.0222
150	850	1000		1.63015	0.121986		75.7257		33.2307	18.0555

## Sheet: ATN
Pressure				Amounts adsorbed			Selectivity		Heats of adsorption
p(CO2)	p(N2)	p_total		n(CO2)	n(N2)		S(CO2/N2)		qst(CO2)	qst(N2)
kPa	kPa	kPa		mmol/g	mmol/g				kJ/mol	kJ/mol
1.5	8.5	10		0.270848	0.0206331		74.3854		32.2925	18.1142
3	17	20		0.486935	0.0367523		75.0782		32.4216	18.1903
4.5	25.5	30		0.657605	0.0494133		75.4134		32.5095	18.2643
6	34	40		0.800215	0.05923		76.5584		32.5955	18.313
7.5	42.5	50		0.9158	0.0670485		77.3997		32.65	18.3526
9	51	60		1.00953	0.0734897		77.8431		32.7147	18.3813
10.5	59.5	70		1.08999	0.0790717		78.1139		32.7465	18.4114
12	68	80		1.15805	0.0839547		78.1643		32.7894	18.4368
13.5	76.5	90		1.21773	0.0876868		78.6945		32.8183	18.4583
15	85	100		1.2778	0.0909715		79.5951		32.8653	18.4703
30	170	200		1.55346	0.111437		78.9946		33.0202	18.4765
45	255	300		1.68157	0.119818		79.5281		33.1087	18.6034
60	340	400		1.76506	0.124066		80.6186		33.1929	18.6151
75	425	500		1.82382	0.125741		82.1924		33.2804	18.6127
90	510	600		1.86517	0.12539		84.2913		33.3029	18.6237
105	595	700		1.91084	0.12489		86.7009		33.39	18.6108
120	680	800		1.94266	0.122959		89.529		33.4185	18.5922
135	765	900		1.98157	0.125515		89.4622		33.5027	18.6156
150	850	1000		2.00716	0.125461		90.6574		33.5416	18.6073

## Sheet: ATT
Pressure				Amounts adsorbed			Selectivity		Heats of adsorption
p(CO2)	p(N2)	p_total		n(CO2)	n(N2)		S(CO2/N2)		qst(CO2)	qst(N2)
kPa	kPa	kPa		mmol/g	mmol/g				kJ/mol	kJ/mol
1.5	8.5	10		0.186649	0.0148308		71.316		32.4478	17.3248
3	17	20		0.354869	0.0281044		71.5521		32.575	17.4005
4.5	25.5	30		0.513827	0.0403071		72.2375		32.6978	17.4689
6	34	40		0.658643	0.050623		73.7276		32.8107	17.5196
7.5	42.5	50		0.788305	0.0604399		73.9091		32.8877	17.5703
9	51	60		0.903178	0.0683626		74.8657		32.9723	17.6213
10.5	59.5	70		1.01708	0.0757008		76.1344		33.0672	17.6633
12	68	80		1.11131	0.082402		76.4231		33.115	17.6939
13.5	76.5	90		1.1933	0.088502		76.4055		33.1479	17.7287
15	85	100		1.27778	0.0947725		76.4016		33.2182	17.7597
30	170	200		1.77112	0.127899		78.4708		33.5275	17.8944
45	255	300		2.04359	0.142182		81.4476		33.7296	17.991
60	340	400		2.19397	0.15272		81.4068		33.8245	18.0123
75	425	500		2.30154	0.15887		82.0928		33.8965	18.0377
90	510	600		2.42347	0.162017		84.7626		34.0165	18.0531
105	595	700		2.44942	0.165216		84.0116		34.0036	18.023
120	680	800		2.53219	0.166923		85.962		34.0861	18.0232
135	765	900		2.57859	0.169644		86.1336		34.1197	18.0298
150	850	1000		2.62399	0.17133		86.7871		34.1767	18.0139

[truncated: 12 more sheets: AVL, BPH, CHA, GIS, GME, KFI, LEV, MER, PHI, RHO, SAV, SIV]
